# Supplementary material for: International rates of receipt of psychological therapy for psychosis and schizophrenia: systematic review and meta-analysis
Source: PubMed Central journal article supplement (PMC10064673; doi:10.1186/s13033-023-00576-9), 2023-03-31
Supplement: 13033_2023_576_MOESM1_ESM.pdf [file 13033_2023_576_MOESM1_ESM.pdf]

**International rates of receipt of psychological therapy for psychosis and  
schizophrenia: Systematic review and meta-analysis**

**Additional File 1**

**1. Database Search Terms**

**International rates of receipt of psychological therapy for psychosis and schizophrenia: Systematic review and meta-analysis**

## **Database Search Terms**

### **PsycInfo**

**Abstract:** schizo\* **OR Abstract:** psychoses **OR Abstract:** psychosis **OR Abstract:** psychotic **AND Abstract:** “cognitive behavior?” OR “psycho\* therap\*” OR “evidence base\*” OR “family intervention” OR “family therapy” OR CBT OR FI OR intervention OR treatment OR guideline\* **AND Abstract:** implementation **OR Abstract:** receipt **OR Abstract:** prevalence **OR Abstract:** incidence **OR Abstract:** referral\* **OR Abstract:** adherence **OR Abstract:** rate\* **NOT Title:** randomi\*ed **AND NOT Methodology:** Qualitative Study **NOT Methodology:** Clinical Case Study **AND Population Group:** Human **AND Year:** 2010 To 2020

### **Pubmed**

**((schizo\*[Title/Abstract] OR psychosis[Title/Abstract] OR psychoses[Title/Abstract] OR psychotic[Title/Abstract]) AND (cognitive-behaviour\*[Title/Abstract] OR cognitive-behavior\*[Title/Abstract] OR psychological-therap\*[Title/Abstract] OR psychotherap\*[Title/Abstract] OR psycho-therap\*[Title/Abstract] OR evidence-base\*[Title/Abstract] OR family-intervention[Title/Abstract] OR family-therapy[Title/Abstract] OR CBT[Title/Abstract] OR FI[Title/Abstract] OR intervention[Title/Abstract] OR treatment[Title/Abstract] OR guideline\*[Title/Abstract])) AND (implementation[Title/Abstract] OR receipt[Title/Abstract] OR prevalence[Title/Abstract] OR incidence[Title/Abstract] OR referral\*[Title/Abstract] OR adherence[Title/Abstract] OR rate\*[Title/Abstract])) NOT (randomised[Title] OR randomized[Title])**

### **Embase**

**(schizo\*:ab,ti OR psychosis:ab,ti OR psychoses:ab,ti) AND ('cognitive behaviour\*':ab,ti OR 'cognitive behavior\*':ab,ti OR 'psychological therap\*':ab,ti OR 'psychotherap\*':ab,ti OR 'psycho-therap\*':ab,ti OR 'evidence base\*':ab,ti OR 'family intervention':ab,ti OR 'family therapy':ab,ti OR cbt:ab,ti OR fi:ab,ti OR intervention:ab,ti OR treatment:ab,ti OR guideline\*:ab,ti) AND (implementation:ab,ti OR receipt:ab,ti OR prevalence:ab,ti OR incidence:ab,ti OR referral\*:ab,ti OR 'patient compliance':ab,ti) NOT randomi\*ed:ti AND [2010-2020]/py AND 'human'/de NOT 'qualitative research'/de NOT 'case study'/de**
