# Supplementary material for: International rates of receipt of psychological therapy for psychosis and schizophrenia: systematic review and meta-analysis
Source: PubMed Central journal article supplement (PMC10064673; doi:10.1186/s13033-023-00576-9), 2023-03-31
Supplement: 13033_2023_576_MOESM2_ESM.pdf [file 13033_2023_576_MOESM2_ESM.pdf]

# International rates of receipt of psychological therapy for psychosis and schizophrenia: Systematic review and meta-analysis

## **Additional File 2**

1. Figure S1: Pooled prevalence of service-users who were offered CBTp
2. Figure S2: Pooled prevalence of service-users who received CBTp in countries with defined treatment guidelines
3. Figure S3: Pooled prevalence of service-users who received CBTp in countries where treatment guidelines were not available
4. Figure S4: Pooled prevalence of service users who received CBTp EI only
5. Figure S5: Pooled prevalence of service users who received FI EI only
6. Table S1: Summary of other recommended therapies
7. Table S2: Summary of predictors of therapy receipt

Figure S1: Pooled prevalence of service-users who were offered CBTp

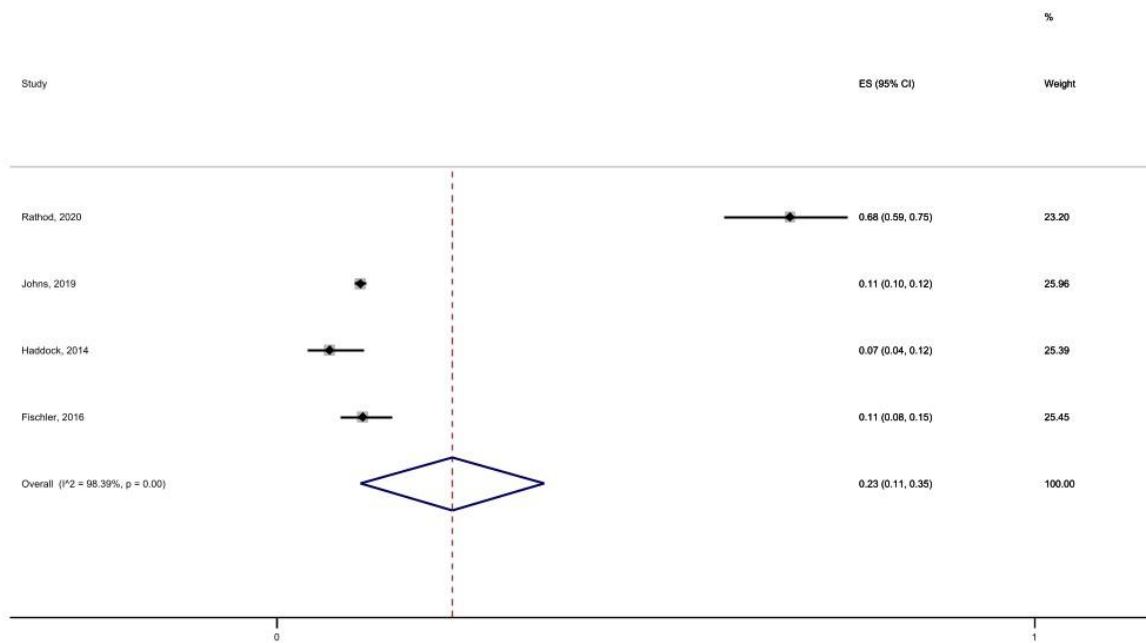

Figure S2: Pooled prevalence of service-users who received CBTp in countries with defined treatment guidelines

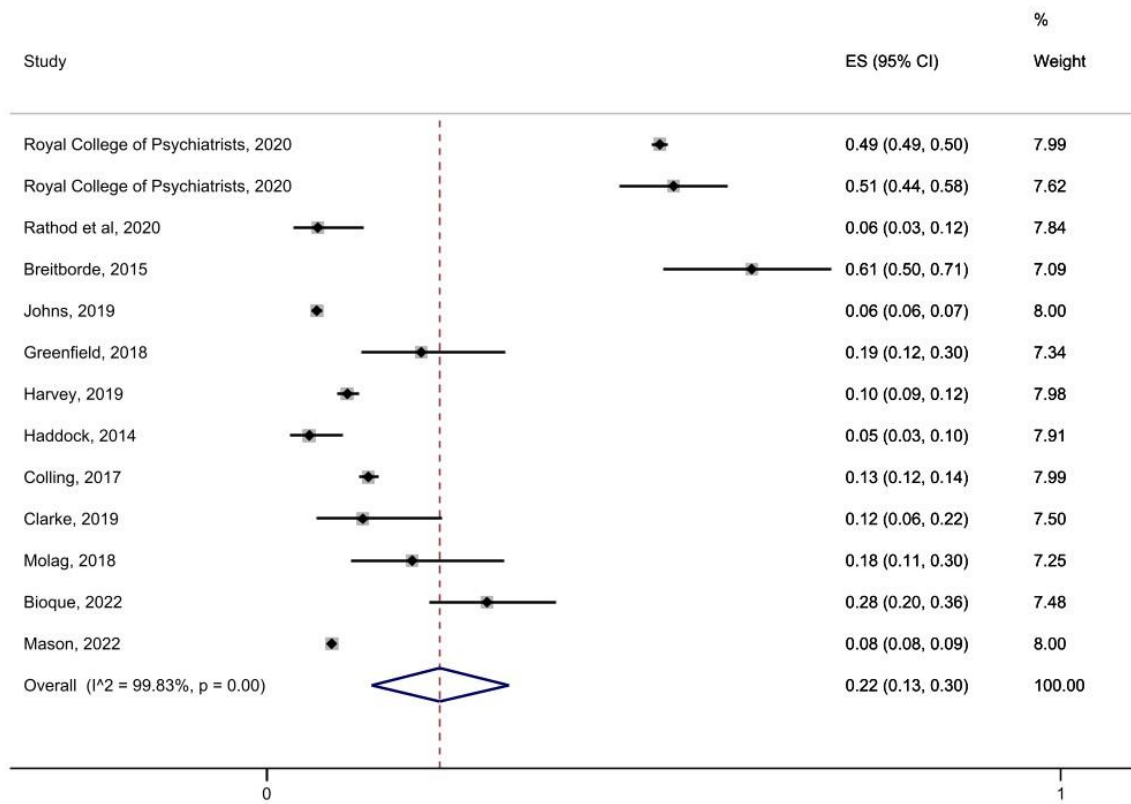

Figure S3: Pooled prevalence of service-users who received CBTp in countries where treatment guidelines were not available

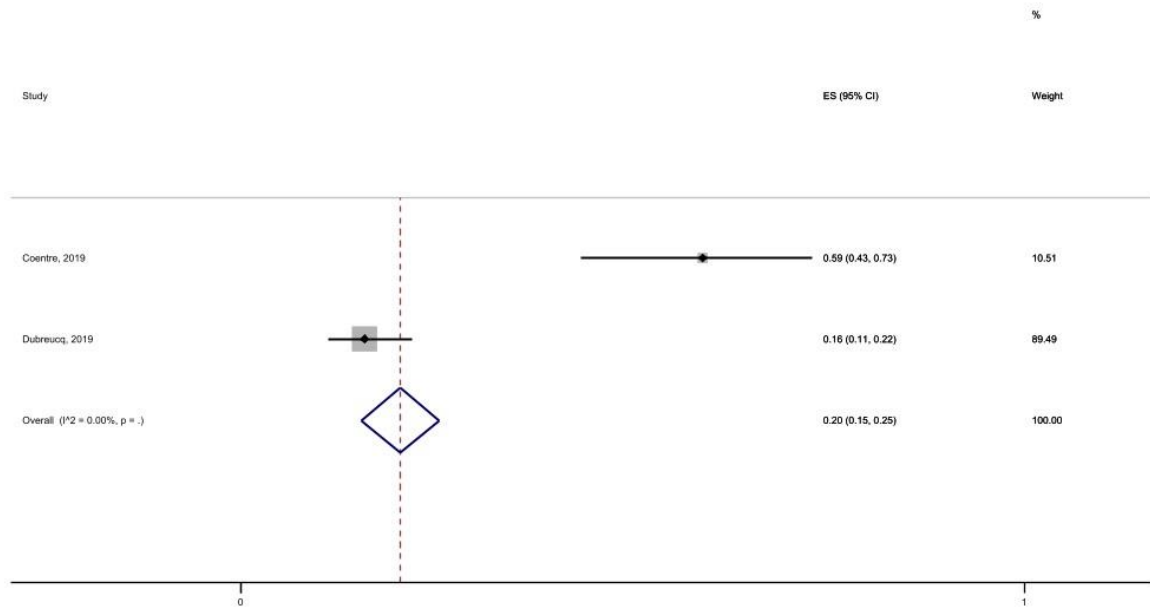

Figure S4: Pooled prevalence of service users who received CBTp EI only

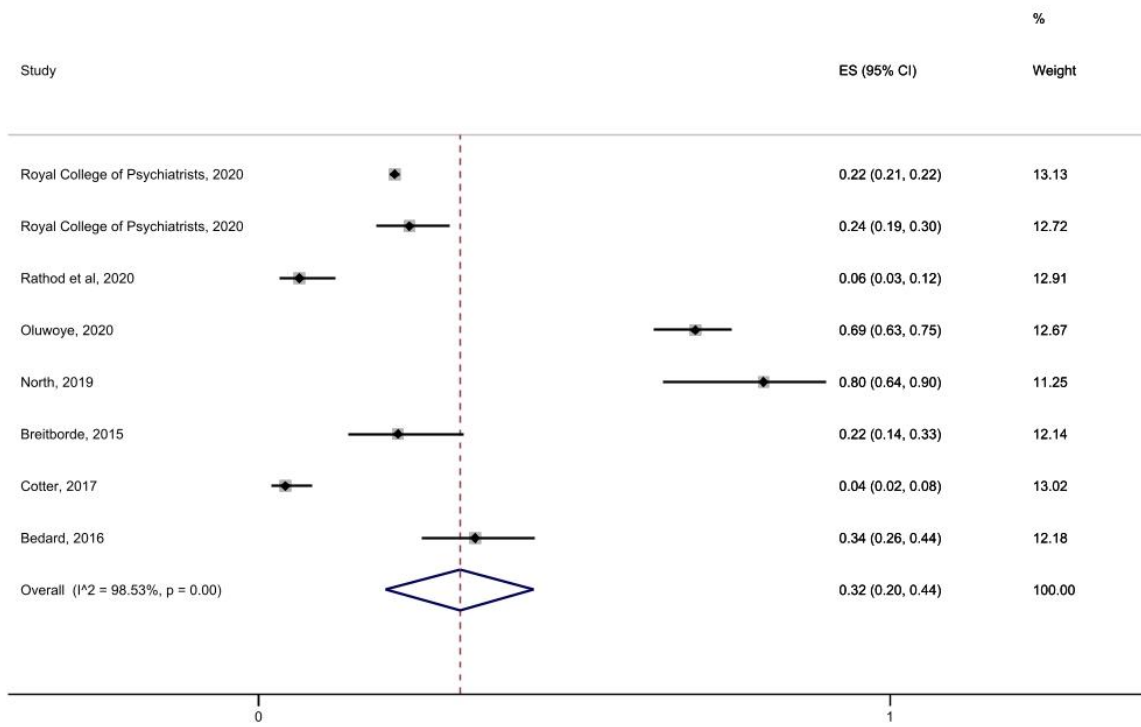

Figure S5: Pooled prevalence of service users who received FI EI only

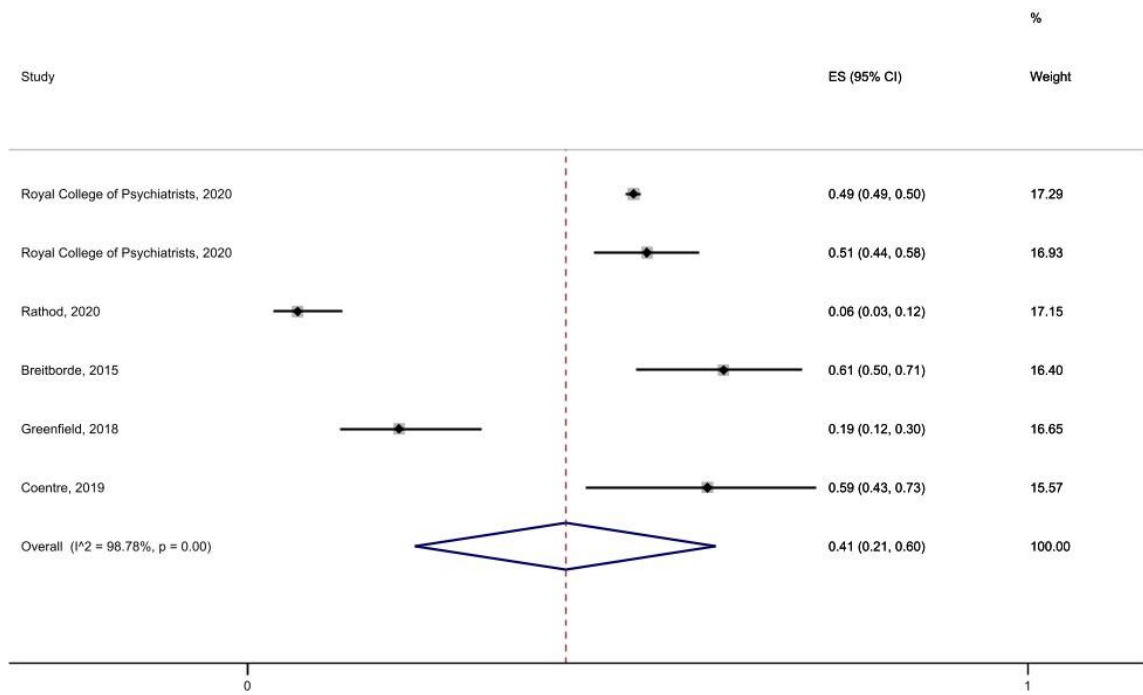

Table S1: Summary of other recommended therapies

| <b>STUDY</b>           | <b>Other recommended therapy</b> | <b>Numerator</b> | <b>Denominator</b> | <b>Percentage</b> |
|------------------------|----------------------------------|------------------|--------------------|-------------------|
| Addington et al. 2012  | Psychotherapy                    | 174              | 216                | 81                |
| Bioque et al. 20200    | Cognitive Remediation therapy    | 6                | 119                | 5.0               |
| Breitborde et al. 2015 | Metacognitive remediation        | 19               | 77                 | 24.7              |
| Coleman et al. 2016    | Psychotherapy                    | 159              | 35,812             | 0.44              |
| Dubreucq et al. 2019   | Cognitive remediation therapy    | 36               | 183                | 19.7              |

Table S2: Summary of predictors of therapy receipt

| 8.5                 |         | Predictor                                                                                                                            |                                                                                                       |                                                                                                                                                         |                                                                                    |                                                                                                              |                                                                                     |
|---------------------|---------|--------------------------------------------------------------------------------------------------------------------------------------|-------------------------------------------------------------------------------------------------------|---------------------------------------------------------------------------------------------------------------------------------------------------------|------------------------------------------------------------------------------------|--------------------------------------------------------------------------------------------------------------|-------------------------------------------------------------------------------------|
| Study               | Therapy | Age                                                                                                                                  | Ethnicity                                                                                             | Diagnosis                                                                                                                                               | Gender                                                                             | Marital Status                                                                                               | Service type                                                                        |
| Colling et al. 2017 | CBTp    | Under 41 - OR = 1.57, 95% CI: 1.01-1.72 compared to Over 41                                                                          | White - OR = 1.43, 95% CI = 1.10 - 1.85.<br>Other - OR = 1.31, 95% CI = 0.93 - 1.86 compared to Black | Other schizophrenia spectrum - OR = 1.52, 95% CI = 1.05 - 2.20.<br>Schizoaffective disorder - OR = 1.48, 95% CI = 1.11 - 1.98 compared to schizophrenia | Not significant, Female OR = 1.2, 95% CI = 0.94 - 1.54, p = 0.139 compared to Male | Not significant, married/cohabiting - OR = 0.95, 95% CI = 0.63 - 1.44, p=0.809 compared with single/divorced | Early Intervention - OR = 1.98, 95% CI = 1.40 - 2.81 compared to Promoting Recovery |
| Haddock et al. 2014 | CBTp    | Not significant, age groups not defined, no data given                                                                               | Not significant, White/Black/Asian/Mixed/Other, no data given                                         | Other psychosis - OR = 3.75, p = 0.053 compared to schizophrenia                                                                                        | Not significant, gender groups not defined, no data given                          | OR = 2.29, p = 0.008 Named carer listed when compared with those who did not                                 |                                                                                     |
| Harvey et al. 2019  | CBTp    | Not significant, Ages 18-34, 35-65, no data given                                                                                    |                                                                                                       | Non affective psychosis - OR = 2.51, CI = 1.79-3.52 compared to affective psychosis                                                                     | Female OR = 2.21, 95% CI = 1.60-3.05 compared to Male                              | Not significant, In a marital/de facto relationship (no/yes), no data given                                  |                                                                                     |
| Mason et al. 2022   | CBTp    | Welch two sample t-test, significant between-group differences (t=15.34, p<0.01) for lower age (M=33.12 SD=11.5) (M=35.88, SD=13.08) |                                                                                                       | Comorbid depression diagnosis ( $\chi^2=87.36$ ), bipolar diagnosis ( $\chi^2=71.94$ ), anxiety diagnosis ( $\chi^2=118.28$ )                           | Not significant, Female compared to Male                                           |                                                                                                              |                                                                                     |
| Oluwoye et al. 2020 | FI      | Not significant, age groups not defined, no data given                                                                               | Not significant, Latinx/Black/Other, no data given                                                    |                                                                                                                                                         |                                                                                    |                                                                                                              |                                                                                     |
